# Supplementary material for: Prevalence and Predictors of Antibiotic Self-Medication in Sudan: A Descriptive Cross-Sectional Study
Source: MDPI journal article supplement (doi:10.3390/antibiotics12030612), 2023-03-20
Supplement: s1 [file s1]

**Supplementary file- Table S1**

**Stratification of the sample based on states:**

| <b>States</b>  | <b>Frequency</b> | <b>Percentage (%)</b> |
|----------------|------------------|-----------------------|
| Northern       | 92               | 6.2                   |
| River Nile     | 82               | 5.5                   |
| Red Sea        | 86               | 5.8                   |
| Kassala        | 79               | 5.3                   |
| Gedaref        | 83               | 5.6                   |
| El Gazira      | 76               | 5.1                   |
| Blue Nile      | 95               | 6.4                   |
| Sennar         | 76               | 5.1                   |
| White Nile     | 84               | 5.6                   |
| North Kordofan | 91               | 6.1                   |
| South Kordofan | 90               | 6.0                   |
| West Kordofan  | 64               | 4.3                   |
| East Darfur    | 90               | 6.0                   |
| South Darfur   | 80               | 5.4                   |
| Central Darfur | 66               | 4.4                   |
| North Darfur   | 82               | 5.5                   |
| West Darfur    | 81               | 5.4                   |
| Khartoum       | 95               | 6.4                   |
| <b>Total</b>   | <b>1492</b>      | <b>100.0</b>          |

**Supplementary file- Table S2**

**QUESTIONNAIRE FOR DATA COLLECTION**

Prevalence and predictors of antibiotic self-medication in Sudan: A descriptive cross-sectional study.

General information (filled by instructors and/or data collectors)

Data of interview:...../...../.....

Participants ID No: .....

| Section one: Demographical characteristics |                   |                                                                              |        |
|--------------------------------------------|-------------------|------------------------------------------------------------------------------|--------|
| No                                         | Questions         | Response                                                                     | Coding |
| 1.                                         | Age               | A. 18-24<br>B. 25-39<br>C. 40-59<br>D. More than 60                          |        |
| 2.                                         | Gender            | A. male<br>B. female                                                         |        |
| 3.                                         | Educational level | A. primary school<br>B. high school<br>C. graduated<br>D. post graduated     |        |
| 4.                                         | Monthly income    | A. less than 12500<br>B. 12500-25000<br>C. 25000-37500<br>D. More than 37500 |        |
| 5.                                         | Health insurance  | A. Yes<br>B. No                                                              |        |

| Section two: reasons, factors, and practice of self-medication with antibiotics. |                                                                                                                            |                                                                                                                                                                                  |      |
|----------------------------------------------------------------------------------|----------------------------------------------------------------------------------------------------------------------------|----------------------------------------------------------------------------------------------------------------------------------------------------------------------------------|------|
| No                                                                               | Questions                                                                                                                  | Responses                                                                                                                                                                        | code |
| 1.                                                                               | In the last 12 months have you ever taken antibiotics to treat yourself without a prescription from a health professional? | A. Yes<br>B. No                                                                                                                                                                  |      |
| 2.                                                                               | What was (were) your reasons of self-medication with antibiotic (check more than if needed)                                | A. cost saving<br>B. convenience<br>C. lack of trust in prescribing doctor                                                                                                       |      |
| 3.                                                                               | For which of the following complaint(s) did you use antibiotics ( check more than one if needed)                           | A. Tonsillitis<br>B. Cough<br>C. Runny nose<br>D. Nasal congestion<br>E. Fever<br>F. Pain<br>G. Diarrhoea<br>H. Wound infection<br>I. Vomiting                                   |      |
| 4.                                                                               | Your selection of antibiotics was based on... (check more than one if applicable)                                          | A. Recommendation by community pharmacists<br><br>B. Opinion of family members<br><br>C. Opinion of friends<br><br>D. My own experience<br><br>E. Previous doctor's prescription |      |
| 5.                                                                               | What did you consider when selecting antibiotics? (check more than one if applicable)                                      | A. Type of antibiotics<br>B. Brand of antibiotics<br>C. Price of antibiotics<br>D. Indications for use                                                                           |      |
| 6.                                                                               | Where did you usually obtain antibiotics from for self-medication? (check more than one if applicable)                     | A. Community pharmacies<br><br>B. Leftover from previous prescription                                                                                                            |      |
| 7.                                                                               | Did you ever check the instructions come with the package insert of antibiotics for self-treatment?                        | A. Yes, always<br>B. Yes, sometimes<br>C. Never<br><br>If Never, please go to Question 9                                                                                         |      |
| 8.                                                                               | How much did you understand the instructions?                                                                              | A. Fully understood<br>B. Partly understood                                                                                                                                      |      |

|     |                                                                                                                       |                                                                                                                                                                                                                                             |  |
|-----|-----------------------------------------------------------------------------------------------------------------------|---------------------------------------------------------------------------------------------------------------------------------------------------------------------------------------------------------------------------------------------|--|
|     |                                                                                                                       | C. Did not understand at all                                                                                                                                                                                                                |  |
| 9.  | How did you know the dosage of antibiotics? (check more than one if applicable)                                       | A. By checking the package insert<br>B. By consulting a doctor<br>C. By consulting a pharmacist<br>D. By consulting family members/friends<br>E. From the Internet<br>F. From my previous experience<br>G. By guessing the dosage by myself |  |
| 10. | Did you ever change the dosage of antibiotics deliberately during the course of self-treatment?                       | A. Yes, always<br>B. Yes, sometimes<br>C. Never<br>If Never, please go to Question 12                                                                                                                                                       |  |
| 11. | Why did you change the dosage of antibiotics during the course of self-treatment? (check more than one if applicable) | A. Improving conditions<br>B. Worsening conditions<br>C. To reduce adverse reactions<br>D. Drug insufficient for complete treatment                                                                                                         |  |
| 12. | Did you ever switch antibiotics during the course of self-treatment?                                                  | A. Yes, always<br>B. Yes, sometimes<br>C. Never<br>If Never, please go to Question 14                                                                                                                                                       |  |
| 13. | Why did you switch antibiotics during the course of self-treatment? (check more than one if applicable)               | A. The former antibiotics did not work<br>B. The latter one was cheaper<br>C. To reduce adverse reactions                                                                                                                                   |  |

|     |                                                                                                        |                                                                                                                                                                                                                                     |  |
|-----|--------------------------------------------------------------------------------------------------------|-------------------------------------------------------------------------------------------------------------------------------------------------------------------------------------------------------------------------------------|--|
| 14. | Have you ever found out that you had taken the same antibiotics with different names at the same time? | A. Yes<br>B. No                                                                                                                                                                                                                     |  |
| 15. | When did you normally stop taking antibiotics? (check more than one if applicable)                     | A. After a few days regardless of the outcome<br>B. After symptoms disappeared<br>C. A few days after the recovery<br>D. After antibiotics ran out<br>E. At the completion of the course<br>F. After consulting a doctor/pharmacist |  |
| 16. | Have you ever had any adverse reaction when you took antibiotics for self-medication?                  | A. Yes (specify)<br>B. No<br>If NO, please go to Question 18                                                                                                                                                                        |  |
| 17. | What did you do for the adverse reactions? (check more than one if applicable)                         | A. Stopped taking antibiotics<br>B. Switched to another antibiotic<br>C. Consulted pharmacy staff<br>D. Consulted a doctor<br>E. Consulted family members/friends                                                                   |  |
| 18. | Please write down the names of antibiotics you have ever taken for SELF-MEDICATION:                    |                                                                                                                                                                                                                                     |  |
| 19. | What do you think about self-medication with antibiotics for self-health care                          | A. Good practice<br>B. Acceptable practice<br>C. Not acceptable practice                                                                                                                                                            |  |
| 20. | Do you think you can treat common infectious diseases with antibiotics successfully by yourself?       | A. Yes, I can<br>B. Not sure<br>C. No, I cannot                                                                                                                                                                                     |  |
